# Supplementary material for: Programmed DNA elimination of germline development genes in songbirds
Source: PubMed Central journal article supplement (PMC6884545; doi:10.1038/s41467-019-13427-4), 2019-11-29
Supplement: 41467_2019_13427_MOESM3_ESM.pdf [file 41467_2019_13427_MOESM3_ESM.pdf]

## **Description of Additional Supplementary Files**

File Name: Supplementary Data 1

Description: Sequences and primers for dph6 FISH probes.

File Name: Supplementary Data 2

Description: Contains Supplementary Table 5, Supplementary Table 6, and Supplementary Table 9.
